# Supplementary material
Source: PubMed Central journal article supplement (PMC4249542)
Supplement: AAC.03509-14_zac012143471so1.pdf [file AAC.03509-14_zac012143471so1.pdf]

**Appendix, TABLE 1** Patient demographics, Safety Analysis Population from ESTABLISH-1 and ESTABLISH-2

| Parameter                                                | Tedizolid 200 mg QD<br>(N = 662) | Linezolid 600 mg BID<br>(N = 662) |
|----------------------------------------------------------|----------------------------------|-----------------------------------|
| Age, y                                                   |                                  |                                   |
| n                                                        | 662                              | 662                               |
| Mean (SD)                                                | 44.6 (15.40)                     | 44.4 (15.37)                      |
| Median                                                   | 45.0                             | 44.0                              |
| (Min, Max)                                               | (17, 86)                         | (15, 100)                         |
| Age group, y, n (%)                                      |                                  |                                   |
| <18                                                      | 1 (0.2)                          | 1 (0.2)                           |
| 18-65                                                    | 597 (90.2)                       | 606 (91.5)                        |
| <65                                                      | 590 (89.1)                       | 603 (91.1)                        |
| ≥65                                                      | 72 (10.9)                        | 59 (8.9)                          |
| ≥75                                                      | 24 (3.6)                         | 25 (3.8)                          |
| Sex, n (%)                                               |                                  |                                   |
| Male                                                     | 429 (64.8)                       | 408 (61.6)                        |
| Female                                                   | 233 (35.2)                       | 254 (38.4)                        |
| Weight, kg                                               |                                  |                                   |
| n                                                        | 662                              | 662                               |
| Mean (SD)                                                | 83.3 (21.63)                     | 83.5 (19.87)                      |
| Median                                                   | 80.0                             | 81.0                              |
| (Min, Max)                                               | (38, 226)                        | (38, 204)                         |
| BMI, kg/m <sup>2</sup>                                   |                                  |                                   |
| n                                                        | 662                              | 662                               |
| Mean (SD)                                                | 28.2 (6.74)                      | 28.4 (6.18)                       |
| Median                                                   | 27.2                             | 27.3                              |
| (Min, Max)                                               | (14, 70)                         | (15, 56)                          |
| BMI subgroup, n (%)                                      |                                  |                                   |
| Underweight (BMI <18.5 kg/m <sup>2</sup> )               | 12 (1.8)                         | 7 (1.1)                           |
| Normal/overweight (BMI ≥18.5 and <30 kg/m <sup>2</sup> ) | 450 (68.0)                       | 426 (64.4)                        |
| Obese (BMI ≥30 kg/m <sup>2</sup> )                       | 200 (30.2)                       | 229 (34.6)                        |
| Diabetes, n (%)                                          | 58 (8.8)                         | 67 (10.1)                         |
| Race, n (%)                                              |                                  |                                   |
| American Indian or Alaska Native                         | 7 (1.1)                          | 9 (1.4)                           |
| Black or African American                                | 77 (11.6)                        | 71 (10.7)                         |
| Asian                                                    | 6 (0.9)                          | 14 (2.1)                          |
| Native Hawaiian or Other Pacific Islander                | 2 (0.3)                          | 3 (0.5)                           |
| White                                                    | 563 (85.0)                       | 555 (83.8)                        |
| Other                                                    | 7 (1.1)                          | 10 (1.5)                          |
| Ethnicity, n (%)                                         |                                  |                                   |
| Hispanic                                                 | 182 (27.5)                       | 170 (25.7)                        |
| Non-Hispanic                                             | 480 (72.5)                       | 492 (74.3)                        |

BID, twice daily; BMI, body mass index; QD, once daily; SD, standard deviation.

Note: Patients with multiple rate entries are categorized as Other.
